# Supplementary material for: Massive Mitochondrial Gene Transfer in a Parasitic Flowering Plant Clade
Source: PubMed Central journal article supplement (PMC3573108; doi:10.1371/journal.pgen.1003265), 2013-02-14
Supplement: pgen.1003265.s003.pdf [file pgen.1003265.s003.pdf]

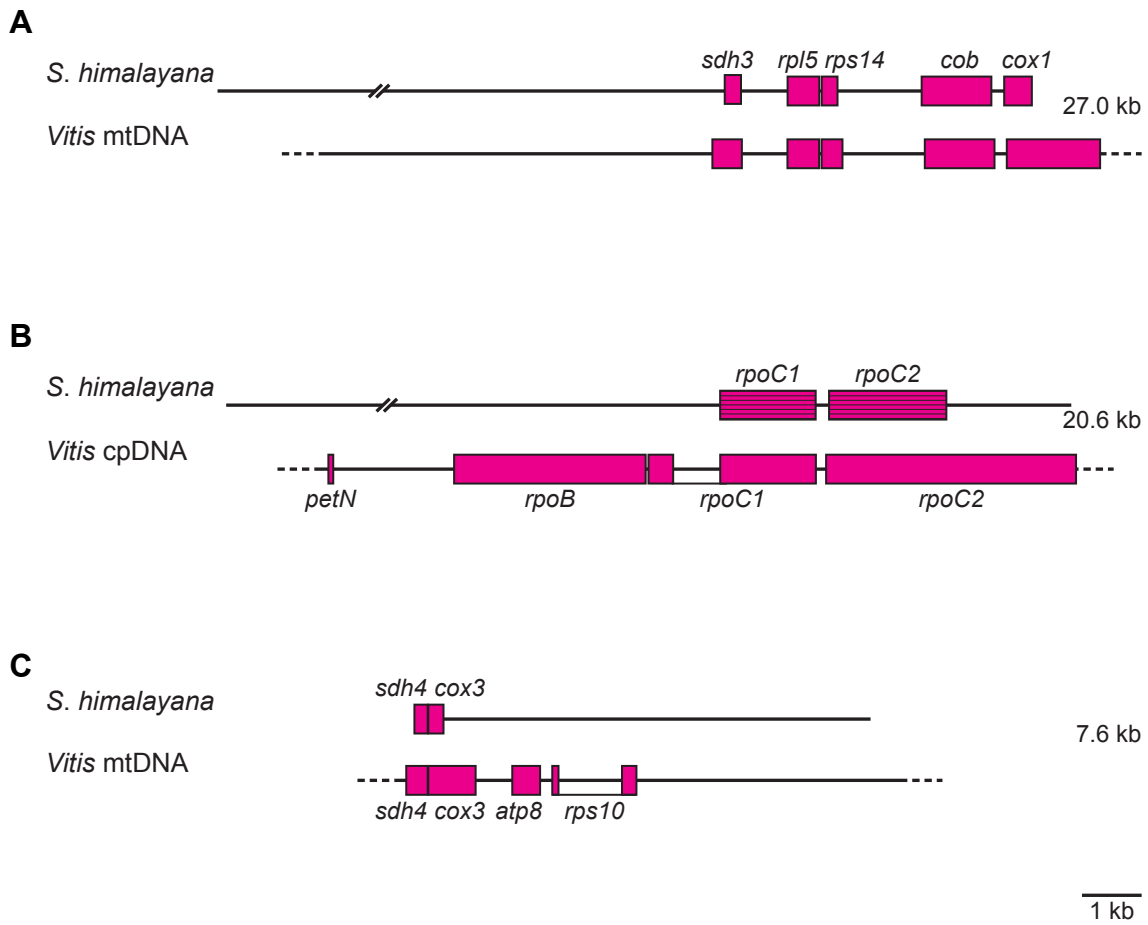

**Figure S3.** Gene organization of three assembled contigs (A–C) for *Sapria himalayana* (Rafflesiaceae) and *Vitis vinifera* (Vitaceae). The red boxes indicate *Vitis*-like genes. Pseudogenes are represented by striped boxes, and the sequence length (in kilobases [kb]) is indicated to the right of each assembled contig.
