# Supplementary material for: Massive Mitochondrial Gene Transfer in a Parasitic Flowering Plant Clade
Source: PubMed Central journal article supplement (PMC3573108; doi:10.1371/journal.pgen.1003265), 2013-02-14
Supplement: pgen.1003265.s004.pdf [file pgen.1003265.s004.pdf]

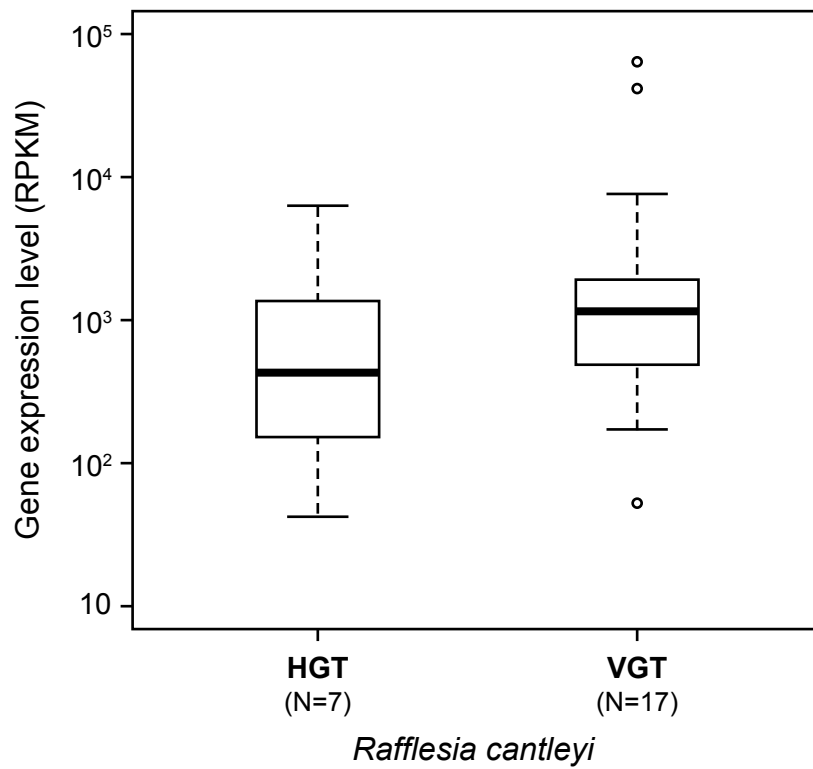

**Figure S4.** Boxplot of gene expression levels of horizontally (HGT) and vertically (VGT) transferred mitochondrial gene sequences in *Rafflesia cantleyi*. The number of gene sequences for each category is shown in parentheses; RPKM = reads per kilobase per million reads.
