# Supplementary material for: Massive Mitochondrial Gene Transfer in a Parasitic Flowering Plant Clade
Source: PubMed Central journal article supplement (PMC3573108; doi:10.1371/journal.pgen.1003265), 2013-02-14
Supplement: pgen.1003265.s005.pdf [file pgen.1003265.s005.pdf]

**Table S1.** Newly sequenced species in this study with associated assembly statistics

| Species                                        | Illumina library source | No. of reads per library | Max. contig length (bp) | N50 (bp) | No. of gene sequences analyzed | Average coverage for gene sequences | NCBI accession number |
|------------------------------------------------|-------------------------|--------------------------|-------------------------|----------|--------------------------------|-------------------------------------|-----------------------|
| <b>Rafflesiaceae</b>                           |                         |                          |                         |          |                                |                                     |                       |
| <i>Rafflesia cantleyi</i> Solms-Laubach        | Enriched mitochondria   | 3,325,206                | 18,830                  | 9,922    | 35                             | 16.1                                | SRR629613             |
| <i>Rafflesia tuan-mudae</i> Becc.              | Total genomic DNA       | 16,592,270               | 39,178                  | 8,738    | 33                             | 9.3                                 | SRR629600             |
| <i>Sapria himalayana</i> Griffith.             | Enriched mitochondria   | 7,957,084                | 53,796                  | 12,290   | 59                             | 42.5                                | SRR629601             |
|                                                | Total genomic DNA       | 12,292,818               | –                       | –        | –                              | –                                   | SRR629606             |
| <b>Vitaceae</b>                                |                         |                          |                         |          |                                |                                     |                       |
| <i>Leea guineensis</i> G. Don                  | Total genomic DNA       | 7,002,750                | 14,273                  | 2,516    | 35                             | 2.2                                 | SRR629604             |
| <i>Tetrastigma cruciatum</i> Craib & Gagnepain | Total genomic DNA       | 9,845,286                | 81,423                  | 3,902    | 50                             | 3.6                                 | SRR629611             |
| <i>Tetrastigma rafflesiae</i> Miq.             | Total genomic DNA       | 10,278,372               | 47,310                  | 3,431    | 48                             | 4.5                                 | SRR629612             |
