# Supplementary material for: Massive Mitochondrial Gene Transfer in a Parasitic Flowering Plant Clade
Source: PubMed Central journal article supplement (PMC3573108; doi:10.1371/journal.pgen.1003265), 2013-02-14
Supplement: pgen.1003265.s007.pdf [file pgen.1003265.s007.pdf]

**Table S3.** Data sources of gene sequences included in our phylogenetic analyses.

| Species                                           | Organelle     | GenBank accession number | No. of gene sequences included |
|---------------------------------------------------|---------------|--------------------------|--------------------------------|
| <i>Arabidopsis thaliana</i> (L.) Heynh.           | Mitochondrion | NC_001284                | 34                             |
|                                                   | Plastid       | NC_000932                | 14                             |
| <i>Beta vulgaris</i> L.                           | Mitochondrion | NC_002511                | 31                             |
|                                                   | Plastid       | –                        | –                              |
| <i>Boea hygrometrica</i> (Bunge) R. Brown         | Mitochondrion | NC_016741                | 29                             |
|                                                   | Plastid       | NC_016468                | 12                             |
| <i>Brassica napus</i> L.                          | Mitochondrion | NC_008285                | 32                             |
|                                                   | Plastid       | NC_016734                | 14                             |
| <i>Carica papaya</i> L.                           | Mitochondrion | NC_012116                | 38                             |
|                                                   | Plastid       | NC_010323                | 14                             |
| <i>Citrullus lanatus</i> (Thunb.) Matsum. & Nakai | Mitochondrion | NC_014043                | 37                             |
|                                                   | Plastid       | –                        | –                              |
| <i>Cucumis sativus</i> L.                         | Mitochondrion | NC_016005                | 34                             |
|                                                   | Plastid       | NC_007144                | 14                             |
| <i>Cucurbita pepo</i> L.                          | Mitochondrion | NC_014050                | 37                             |
|                                                   | Plastid       | –                        | –                              |
| <i>Cycas taitungensis</i> Shen, Hill, Tsou & Chen | Mitochondrion | NC_010303                | 37                             |
|                                                   | Plastid       | NC_009618                | 14                             |
| <i>Daucus carota</i> L.                           | Mitochondrion | NC_017855                | 31                             |
|                                                   | Plastid       | NC_008325                | 12                             |
| <i>Lotus japonicus</i> L.                         | Mitochondrion | NC_016743                | 31                             |
|                                                   | Plastid       | NC_002694                | 14                             |
| <i>Malus domestica</i> Borkh.                     | Mitochondrion | NC_018554                | 32                             |
|                                                   | Plastid       | –                        | –                              |
| <i>Millettia pinnata</i> (L.) Panigrahi           | Mitochondrion | NC_016742                | 32                             |
|                                                   | Plastid       | NC_016708                | 14                             |
| <i>Mimulus guttatus</i> DC.                       | Mitochondrion | NC_018041                | 34                             |
|                                                   | Plastid       | –                        | –                              |
| <i>Nicotiana tabacum</i> L.                       | Mitochondrion | NC_006581                | 37                             |
|                                                   | Plastid       | NC_001879                | 14                             |

|                                           |               |           |    |
|-------------------------------------------|---------------|-----------|----|
| <i>Oryza sativa</i> L.                    | Mitochondrion | NC_011033 | 36 |
|                                           | Plastid       | NC_001320 | 14 |
| <i>Phoenix dactylifera</i> L.             | Mitochondrion | NC_016740 | 36 |
|                                           | Plastid       | NC_013991 | 14 |
| <i>Raphanus sativus</i> L.                | Mitochondrion | NC_018551 | 32 |
|                                           | Plastid       | -         | -  |
| <i>Ricinus communis</i> L.                | Mitochondrion | NC_015141 | 38 |
|                                           | Plastid       | NC_016736 | 14 |
| <i>Silene latifolia</i> Poir.             | Mitochondrion | NC_014487 | 29 |
|                                           | Plastid       | NC_016730 | 14 |
| <i>Sorghum bicolor</i> (L.) Moench        | Mitochondrion | NC_008360 | 32 |
|                                           | Plastid       | NC_008602 | 12 |
| <i>Spirodela polyrrhiza</i> (L.) Schleid. | Mitochondrion | NC_017840 | 34 |
|                                           | Plastid       | NC_015891 | 11 |
| <i>Tripsacum dactyloides</i> L.           | Mitochondrion | NC_008362 | 31 |
|                                           | Plastid       | -         | -  |
| <i>Triticum aestivum</i> L.               | Mitochondrion | NC_007579 | 33 |
|                                           | Plastid       | NC_002762 | 12 |
| <i>Vigna radiata</i> (L.) R. Wilczek      | Mitochondrion | NC_015121 | 31 |
|                                           | Plastid       | NC_013843 | 14 |
| <i>Vitis vinifera</i> L.                  | Mitochondrion | NC_012119 | 47 |
|                                           | Plastid       | NC_007957 | 14 |
| <i>Zea mays</i> L.                        | Mitochondrion | NC_008332 | 32 |
|                                           | Plastid       | NC_001666 | 12 |

---
